# Supplementary material
Source: PubMed Central journal article supplement (PMC7781156)
Supplement: NIHMS1052896-supplement-Supplemental_Material_2.pdf [file NIHMS1052896-supplement-Supplemental_Material_2.pdf]

## Appendix A

|                       |                         |
|-----------------------|-------------------------|
| music_box.jpg         | guacamole.jpg           |
| towel.jpg             | peanutbutter.jpg        |
| Vase.jpg              | fish_stick.jpg          |
| sink.jpg              | cucumber.jpg            |
| Onions_rings.jpg      | drainer.jpg             |
| Pistachio.jpg         | batt_baseball.jpg       |
| lasagna.jpg           | bulb.jpg                |
| Macaron.jpg           | scales_kitchen.jpg      |
| brownies.jpg          | toilet_paper.jpg        |
| melon.jpg             | globe_world.jpg         |
| coathanger.jpg        | pancakes.jpg            |
| exercice_bike.jpg     | beans.jpg               |
| Candy_canes.jpg       | coffee_table.jpg        |
| tablecloth.jpg        | club_sandwich.jpg       |
| portable_phone.jpg    | chips.jpg               |
| soup.jpg              | mattress.jpg            |
| artichoke.jpg         | yoga_carpet.jpg         |
| dry_raisin.jpg        | shoe_rack.jpg           |
| mars.jpg              | sewing_needle.jpg       |
| keys.jpg              | Spaghetti.jpg           |
| kettle.jpg            | Toblerone.jpg           |
| candle.jpg            | raspberries.jpg         |
| salmon.jpg            | letter_tray.jpg         |
| fire_extinguisher.jpg | fig.jpg                 |
| blue_cheese.jpg       | shelf1.jpg              |
| cheesecake.jpg        | curtain.jpg             |
| tortilla_chips.jpg    | luggage.jpg             |
| bottle_spray.jpg      | ice_cream_sandwich.jpg  |
| Marshmallows.jpg      | thumbtack.jpg           |
| candy_sugar_apple.jpg | ironing_board.jpg       |
| donuts.jpg            | blackboard.jpg          |
| garage.jpg            | tofu.jpg                |
| poster_frame.jpg      | burrito.jpg             |
| TV.jpg                | wafle.jpg               |
| comb.jpg              | tacos.jpg               |
| slimline_radiator.jpg | potato_baked.jpg        |
| pizza_food.jpg        | bed_single.jpg          |
| empanada.jpg          | linen_basket.jpg        |
| floor_lamp.jpg        | chocolate_ice_cream.jpg |
| toaster.jpg           | Hot_Dog.jpg             |
| froot_loops.jpg       | glass.jpg               |
| popcorn.jpg           | mailbox.jpg             |
| pumpkin.jpg           | ice_maker.jpg           |
| pencil_cup.jpg        | sugar_daddy_lolipop.jpg |

## Appendix A

|                   |                      |
|-------------------|----------------------|
| tea_towel.jpg     | bread.jpg            |
| sponge.jpg        | grape.jpg            |
| flashlight.jpg    | Muffin.jpg           |
| pinapple.jpg      | heater.jpg           |
| notepad.jpg       | strawberry.jpg       |
| eggplant.jpg      | armchair.jpg         |
| folding_rule.jpg  | apricot.jpg          |
| Sandwich.jpg      | corkscrew.jpg        |
| rake.jpg          | croissant.jpg        |
| floor_wood.jpg    | grilled_zucchini.jpg |
| cherries.jpg      | cushion.jpg          |
| pecan_nuts.jpg    | matches.jpg          |
| desk_wood.jpg     | blueberriess.jpg     |
| Chicken_Wings.jpg | Tapis.jpg            |
| candy_floss.jpg   | jewellery_box.jpg    |
| kleenex.jpg       | avocado.jpg          |
| Coconut.jpg       | cocktail_shaker.jpg  |
| sausages.jpg      | interphone.jpg       |
| Meat_balls.jpg    | night_table.jpg      |
| mirror.jpg        | Cupcake.jpg          |
| tomato.jpg        | ceiling_lamp.jpg     |
| bun_steamed.jpg   | bell_door.jpg        |
| tiramisu.jpg      | dresser.jpg          |
| house_plant.jpg   | rice.jpg             |
| leash_dog.jpg     | steak.jpg            |
| stool.jpg         | quinoa_salad.jpg     |
| bathhtub.jpg      | ribs.jpg             |
| wool_ball.jpg     | milkshake.jpg        |
