# Supplementary material
Source: PubMed Central journal article supplement (PMC7781156)
Supplement: NIHMS1052896-supplement-Supplemental_Material_3.pdf [file NIHMS1052896-supplement-Supplemental_Material_3.pdf]

## Appendix C

| <b>Stimuli</b>          | <b>Category</b> | <b>kcal_100g</b> | <b>high=2;low=1</b> |
|-------------------------|-----------------|------------------|---------------------|
| pinapple.jpg            | food            | 49.39            | 1                   |
| apricot.jpg             | food            | 42.85            | 1                   |
| artichoke.jpg           | food            | 53.3             | 1                   |
| avocado.jpg             | food            | 169.11           | 1                   |
| blue_cheese.jpg         | food            | 352.73           | 2                   |
| blueberriess.jpg        | food            | 57.14            | 1                   |
| bread.jpg               | food            | 271.73           | 2                   |
| brownies.jpg            | food            | 460              | 2                   |
| bun_steamed.jpg         | food            | 233.33           | 1                   |
| burrito.jpg             | food            | 178              | 1                   |
| Candy_canes.jpg         | food            | 392.85           | 2                   |
| candy_floss.jpg         | food            | 392.3            | 2                   |
| candy_sugar_apple.jpg   | food            | 107.42           | 1                   |
| cheesecake.jpg          | food            | 320              | 2                   |
| cherries.jpg            | food            | 63.41            | 1                   |
| Chicken_Wings.jpg       | food            | 254.9            | 2                   |
| chips.jpg               | food            | 535.71           | 2                   |
| chocolate_ice_cream.jpg | food            | 215.9            | 1                   |
| club_sandwich.jpg       | food            | 234.09           | 2                   |
| Coconut.jpg             | food            | 458.82           | 2                   |
| croissant.jpg           | food            | 402.98           | 2                   |
| cucumber.jpg            | food            | 14.92            | 1                   |
| Cupcake.jpg             | food            | 386.66           | 2                   |
| donuts.jpg              | food            | 204.68           | 1                   |
| dry_raisin.jpg          | food            | 300              | 2                   |
| eggplant.jpg            | food            | 35.33            | 1                   |
| empanada.jpg            | food            | 333.33           | 2                   |
| fig.jpg                 | food            | 70               | 1                   |
| fish_stick.jpg          | food            | 280.8            | 2                   |
| bean.jpg                | food            | 127.11           | 1                   |
| froot_loops.jpg         | food            | 379.31           | 2                   |
| grape.jpg               | food            | 71.42            | 1                   |
| grilled_zucchini.jpg    | food            | 31.89            | 1                   |
| guacamole.jpg           | food            | 150              | 1                   |
| Hot_Dog.jpg             | food            | 333.3            | 2                   |
| ice_cream_sandwich.jpg  | food            | 237.14           | 2                   |
| lasagna.jpg             | food            | 155.76           | 1                   |
| Macaron.jpg             | food            | 390.9            | 2                   |
| pumpkin.jpg             | food            | 20.4             | 1                   |
| mars.jpg                | food            | 460.37           | 2                   |

## Appendix C

|                          |      |        |   |
|--------------------------|------|--------|---|
| Marshmallows.jpg         | food | 319.44 | 2 |
| Meat_balls.jpg           | food | 286.72 | 2 |
| melon.jpg                | food | 33.89  | 1 |
| milkshake.jpg            | food | 119.16 | 1 |
| Muffin.jpg               | food | 375.22 | 2 |
| Onions_rings.jpg         | food | 43.61  | 1 |
| pancakes.jpg             | food | 227.5  | 1 |
| peanutbutter.jpg         | food | 587.5  | 2 |
| pecan_nuts.jpg           | food | 666.66 | 2 |
| Pistachio.jpg            | food | 571.42 | 2 |
| pizza_food.jpg           | food | 266.35 | 2 |
| popcorn.jpg              | food | 534.48 | 2 |
| potato_baked.jpg         | food | 93.06  | 1 |
| quinoa_salad.jpg         | food | 113.38 | 1 |
| raspberries.jpg          | food | 50     | 1 |
| ribs.jpg                 | food | 317.5  | 2 |
| rice.jpg                 | food | 129.74 | 1 |
| salmon.jpg               | food | 206.16 | 1 |
| Sandwich.jpg             | food | 217.44 | 1 |
| sausages.jpg             | food | 332.94 | 2 |
| soup.jpg                 | food | 25     | 1 |
| Spaghetti.jpg            | food | 150    | 1 |
| steak.jpg                | food | 277.82 | 2 |
| strawberry.jpg           | food | 32.22  | 1 |
| sugar_daddy_lollipop.jpg | food | 416.66 | 2 |
| tacos.jpg                | food | 205.88 | 1 |
| tiramisu.jpg             | food | 328.73 | 2 |
| Toblerone.jpg            | food | 545.45 | 2 |
| tofu.jpg                 | food | 83.51  | 1 |
| tomato.jpg               | food | 17.88  | 1 |
| tortilla_chips.jpg       | food | 466.66 | 2 |
| wafle.jpg                | food | 290    | 2 |
